# Supplementary material for: Molecular Characterization and Cross-Reactivity of Feline Calicivirus Circulating in Southwestern China
Source: MDPI journal article supplement (doi:10.3390/v13091812), 2021-09-12
Supplement: s1 [file s1]

Table S1. Primers used to amplify the VP1 HV and full-length genome of FCV strains in this study.

| Primer name <sup>a</sup> | Primers sequence (5'-3') | Location <sup>b</sup> | Length (bp) |
|--------------------------|--------------------------|-----------------------|-------------|
| FCV-VP1-F                | TTTATGTTGCTTGGTCTGG      | 5933-7262             | 1329        |
| FCV-VP1-R                | ATTCCCATGTAGGAGGCA       |                       |             |
| FCV-A-F                  | GTAAAAGAAATCTGAGACAATG   | 1-2789                | 2788        |
| FCV-A-R                  | AAGATTTTCAGACCATGGC      |                       |             |
| FCV-B-F                  | GGTGCTCGTATCTGGGC        | 2665-4797             | 2132        |
| FCV-B-R                  | GTAGACACCATCATCACCAT     |                       |             |
| FCV-C-F                  | TGTCTGTATGTTGGGTG        | 4683-5961             | 1278        |
| FCV-C-R                  | CTCCACAGACCCAGACC        |                       |             |
| FCV-D-F                  | AACCTGCGCTAACGTGCTTA     | 5350-6274             | 944         |
| FCV-D-R                  | CAGTGACAATACACCCAGAAG    |                       |             |
| FCV-E-F                  | TTTATGTTGCTTGGTCTGG      | 5933-7262             | 1329        |
| FCV-E-R                  | ATTCCCATGTAGGAGGCA       |                       |             |
| FCV-F-F                  | GGCATGTACGTCTGTGGG       | 6706-7683             | 977         |
| FCV-F-R                  | CACTGGGGTTAGACGC         |                       |             |

<sup>a</sup> F and R represent forward and reverse primers, respectively. <sup>b</sup> The location is according to the genomic sequences of FCV-21223 strain (GenBank no. JX519212).
